# Supplementary material for: Factors that influence the angular error in active knee angle reproduction tests: A systematic review and meta‐analysis
Source: PubMed Central journal article supplement (PMC11269366; doi:10.1002/jeo2.12091), 2024-07-24
Supplement: JEO2-11-e12091-s002.pdf [file JEO2-11-e12091-s002.pdf]

| Study                       | N #                  | Sex [f/m/b] | Age [yrs.]   | Level of Fitness               | Body position                       |                                     | Direction of Mov.                   |                                     | Target $\alpha$ in [°]   | Reps # | Meta [Group] | Intervention                                                                                                                                                                                                                                                                               |                        |
|-----------------------------|----------------------|-------------|--------------|--------------------------------|-------------------------------------|-------------------------------------|-------------------------------------|-------------------------------------|--------------------------|--------|--------------|--------------------------------------------------------------------------------------------------------------------------------------------------------------------------------------------------------------------------------------------------------------------------------------------|------------------------|
|                             |                      |             |              |                                | prone                               | sitting                             | Extension                           | Flexion                             |                          |        |              |                                                                                                                                                                                                                                                                                            |                        |
| Chen et al. (2018)          | 12                   | m           | 22 ± 1       | recreational active            | <input checked="" type="checkbox"/> | <input type="checkbox"/>            | <input type="checkbox"/>            | <input checked="" type="checkbox"/> | 30                       | 5      | Fatigue      | Treadmill (10 min., 6.4 kmh <sup>-1</sup> , 1%).                                                                                                                                                                                                                                           |                        |
|                             |                      |             |              |                                | <input checked="" type="checkbox"/> | <input type="checkbox"/>            | <input type="checkbox"/>            | <input checked="" type="checkbox"/> | 50                       | 5      | Fatigue      | Treadmill (10 min., 6.4 kmh <sup>-1</sup> , 1%).                                                                                                                                                                                                                                           |                        |
|                             |                      |             |              |                                | <input checked="" type="checkbox"/> | <input type="checkbox"/>            | <input type="checkbox"/>            | <input checked="" type="checkbox"/> | 70                       | 5      | Fatigue      | Treadmill (10 min., 6.4 kmh <sup>-1</sup> , 1%).                                                                                                                                                                                                                                           |                        |
| Clark et al. (2016)         | 12                   | f           | 26 ± 6       | recreational active            | <input checked="" type="checkbox"/> | <input checked="" type="checkbox"/> | <input checked="" type="checkbox"/> | <input checked="" type="checkbox"/> | 45                       | 5      | BP & DoM     |                                                                                                                                                                                                                                                                                            |                        |
| Gear et al. (2011)          | 10                   | f           | 19 ± 1       | PRO Foot- & Basketball         | <input type="checkbox"/>            | <input checked="" type="checkbox"/> | <input checked="" type="checkbox"/> | <input type="checkbox"/>            | 15-45                    | 3      | Fatigue      | Hamstrings muscle fatigue: <b>Phase 1:</b> ( $V_{\alpha}$ , reps): 90°s <sup>-1</sup> , 10; 180°s <sup>-1</sup> , 15; 240°s <sup>-1</sup> , 20; 300°s <sup>-1</sup> , 25; 40 s rest. <b>Phase 2:</b> 180°s <sup>-1</sup> until hamstring PT < 90%, 70%, or 50% PT <sub>max</sub> , 3 reps. |                        |
|                             | 08                   | m           | 21 ± 1       | PRO Foot- & Basketball         | <input type="checkbox"/>            | <input checked="" type="checkbox"/> | <input checked="" type="checkbox"/> | <input type="checkbox"/>            | 15-45                    | 3      | Fatigue      | Hamstrings muscle fatigue: <b>Phase 1:</b> ( $V_{\alpha}$ , reps): 90°s <sup>-1</sup> , 10; 180°s <sup>-1</sup> , 15; 240°s <sup>-1</sup> , 20; 300°s <sup>-1</sup> , 25; 40 s rest. <b>Phase 2:</b> 180°s <sup>-1</sup> until hamstring PT < 90%, 70%, or 50% PT <sub>max</sub> , 3 reps. |                        |
| Goetschius et al. (2013)    | 20                   | b           | 25 ± 5       | recreational active            | <input type="checkbox"/>            | <input checked="" type="checkbox"/> | <input checked="" type="checkbox"/> | <input type="checkbox"/>            | 15                       | 3      | Fatigue      | Treadmill (5 min., 4.8-5.6 kmh <sup>-1</sup> , 0%+1%/min to max. 15%) + 1 min squat & lateral jumps); 6 cycles.                                                                                                                                                                            |                        |
|                             |                      |             |              |                                | <input type="checkbox"/>            | <input checked="" type="checkbox"/> | <input checked="" type="checkbox"/> | <input type="checkbox"/>            | 45                       | 3      | Fatigue      | Treadmill (5 min., 4.8-5.6 kmh <sup>-1</sup> , 0%+1%/min to max. 15%) + 1 min squat & lateral jumps); 6 cycles.                                                                                                                                                                            |                        |
| Haggerty et al. (2021)      | 20                   | b           | 21 ± 2       | healthy                        | <input type="checkbox"/>            | <input checked="" type="checkbox"/> | <input checked="" type="checkbox"/> | <input checked="" type="checkbox"/> | 20                       | 6      | DoM          |                                                                                                                                                                                                                                                                                            |                        |
| Han et al. (2014)           | 15                   | f           | 21 ± 1       | healthy                        | <input type="checkbox"/>            | <input checked="" type="checkbox"/> | <input checked="" type="checkbox"/> | <input type="checkbox"/>            | 30-60                    | 1      | Fatigue      | Quadriceps muscle fatigue: 3 sets; 10 squats; 30 s rest between sets, speed 20 bpm (metronome).                                                                                                                                                                                            |                        |
|                             | 15                   | m           | 22 ± 1       | healthy                        | <input type="checkbox"/>            | <input checked="" type="checkbox"/> | <input checked="" type="checkbox"/> | <input type="checkbox"/>            | 30-60                    | 1      | Fatigue      | Quadriceps muscle fatigue: 3 sets; 10 squats; 30 s rest between sets, speed 20 bpm (metronome).                                                                                                                                                                                            |                        |
| Ju et al. (2010)            | 15                   | b           | 24 ± 1       | healthy                        | <input type="checkbox"/>            | <input checked="" type="checkbox"/> | <input checked="" type="checkbox"/> | <input type="checkbox"/>            | 10-80                    | 1      | Fatigue      | Quadriceps muscle fatigue: concentric & eccentric MVC (120°/s & 60 rep).                                                                                                                                                                                                                   |                        |
| Kellari et al. (2023)       | 54                   | b           | 21 ± 3       | healthy                        | <input type="checkbox"/>            | <input checked="" type="checkbox"/> | <input checked="" type="checkbox"/> | <input type="checkbox"/>            | 45                       | 1      | Fatigue      | Quadriceps muscle fatigue: max. concentric contraction; 20°/s un- til trials j50% of the maximal extensors maximal peak torque.                                                                                                                                                            |                        |
| Larsen et al. (2021)        | 20                   | b           | 25 (21 – 31) | PRO & recreational ac-<br>tive | <input checked="" type="checkbox"/> | <input checked="" type="checkbox"/> | <input checked="" type="checkbox"/> | <input checked="" type="checkbox"/> | 50-70                    | 1      | BP           |                                                                                                                                                                                                                                                                                            |                        |
| Marks (1994)                | 6                    | f           | 18 – 30      | healthy                        | <input type="checkbox"/>            | <input checked="" type="checkbox"/> | <input checked="" type="checkbox"/> | <input type="checkbox"/>            | 45-75                    | 5      | Fatigue      | Quadriceps muscle fatigue: 20 high-speed reciprocal concentric & eccentric MVC.                                                                                                                                                                                                            |                        |
| Miura et al. (2004)         | 27                   | m           | 22 (21 – 30) | healthy                        | <input type="checkbox"/>            | <input checked="" type="checkbox"/> | <input checked="" type="checkbox"/> | <input type="checkbox"/>            | 10-80                    | 8      | Fatigue      | MVC (flexion-extension) (120°/s, 60 reps).                                                                                                                                                                                                                                                 |                        |
| Niederseer et al. (2014)    | 18                   | m           | 22 ± 5       | PRO Handball                   | <input type="checkbox"/>            | <input checked="" type="checkbox"/> | <input checked="" type="checkbox"/> | <input type="checkbox"/>            | random                   | 6      | Fatigue      | Treadmill (5 min., 10 kmh <sup>-1</sup> , 10%).                                                                                                                                                                                                                                            |                        |
|                             | Olsson et al. (2004) |             | 39           | 27 (18 – 50)                   | healthy                             | <input checked="" type="checkbox"/> | <input checked="" type="checkbox"/> | <input checked="" type="checkbox"/> | <input type="checkbox"/> | 30-40  | 3            | BP                                                                                                                                                                                                                                                                                         | 90 min handball match. |
|                             |                      |             |              |                                |                                     |                                     |                                     |                                     |                          | 50-70  | 3            | BP                                                                                                                                                                                                                                                                                         |                        |
|                             |                      |             |              |                                |                                     |                                     |                                     |                                     | 70-100                   | 3      | BP           |                                                                                                                                                                                                                                                                                            |                        |
| Paschalis et al. (2007)     | 12                   | f           | 20 ± 1       | untrained                      | <input type="checkbox"/>            | <input checked="" type="checkbox"/> | <input checked="" type="checkbox"/> | <input type="checkbox"/>            | 45                       | 4      | Fatigue      | Isokinetic eccentric MVC (60 90°s <sup>-1</sup> , 5 sets, 15 reps, 2 min rest).                                                                                                                                                                                                            |                        |
| Paschalis et al. (2013)     | 12                   | f           | 20 ± 1       | untrained                      | <input type="checkbox"/>            | <input checked="" type="checkbox"/> | <input checked="" type="checkbox"/> | <input type="checkbox"/>            | 30                       | 4      | Fatigue      | Isokinetic eccentric MVC (60 90°s <sup>-1</sup> , 5 sets, 15 reps, 2 min rest).                                                                                                                                                                                                            |                        |
|                             |                      |             |              |                                |                                     |                                     |                                     |                                     | 45                       | 4      | Fatigue      | Isokinetic eccentric MVC (60 90°s <sup>-1</sup> , 5 sets, 15 reps, 2 min rest).                                                                                                                                                                                                            |                        |
|                             |                      |             |              |                                |                                     |                                     |                                     |                                     | 60                       | 4      | Fatigue      | Isokinetic eccentric MVC (60 90°s <sup>-1</sup> , 5 sets, 15 reps, 2 min rest).                                                                                                                                                                                                            |                        |
| Relph & Herrington (2015)   | 10                   | f           | 30 ± 9       | Tegener Score: 5 ± 2           | <input type="checkbox"/>            | <input checked="" type="checkbox"/> | <input checked="" type="checkbox"/> | <input checked="" type="checkbox"/> | 10-30                    | 15     | BP & DoM     |                                                                                                                                                                                                                                                                                            |                        |
|                             |                      |             |              |                                |                                     |                                     |                                     |                                     | 30-60                    | 15     | BP & DoM     |                                                                                                                                                                                                                                                                                            |                        |
|                             |                      |             |              |                                |                                     |                                     |                                     |                                     | 60-90                    | 15     | BP & DoM     |                                                                                                                                                                                                                                                                                            |                        |
| Relph & Herrington (2016)   | 25                   | f           | 30 – 44      | Tegener Score: 5               | <input type="checkbox"/>            | <input checked="" type="checkbox"/> | <input checked="" type="checkbox"/> | <input checked="" type="checkbox"/> | 30-60/60-90              | 5      | DoM          |                                                                                                                                                                                                                                                                                            |                        |
|                             |                      |             | 45 – 59      | Tegener Score: 4               | <input type="checkbox"/>            | <input checked="" type="checkbox"/> | <input checked="" type="checkbox"/> | <input checked="" type="checkbox"/> | 30-60/60-90              | 5      | DoM          |                                                                                                                                                                                                                                                                                            |                        |
| Ribeiro et al. (2008)       | 17                   | f           | 18 ± 2       | PRO Volleyball                 | <input type="checkbox"/>            | <input checked="" type="checkbox"/> | <input checked="" type="checkbox"/> | <input type="checkbox"/>            | 40-60                    | 3      | Fatigue      | Volleyball match (90 min match; 25 min warm-up (stretching, passing, setting, attacking, serving exercises)).                                                                                                                                                                              |                        |
| Ribeiro et al. (2011)       | 40                   | m           | 22 ± 3       | healthy                        | <input type="checkbox"/>            | <input checked="" type="checkbox"/> | <input checked="" type="checkbox"/> | <input type="checkbox"/>            | 60                       | 3      | Fatigue      | MVC concentric/eccentric (extensors & flexors; 180°s <sup>-1</sup> , 30 reps).                                                                                                                                                                                                             |                        |
| Romero-Franco et al. (2014) | 15                   | b           | 26 ± 7       | PRO Track & Field              | <input type="checkbox"/>            | <input checked="" type="checkbox"/> | <input checked="" type="checkbox"/> | <input type="checkbox"/>            | 40-60                    | 3      | Fatigue      | <b>Warm-up:</b> 30 min (10 min low-speed race (8 km/h), 5 min dynamic stretching, 15 min technical running exercises); <b>Lactic Exercise:</b> 2 groups of 2 series of 300 m performed at 90–92%, rest 5 min between series & 10 min between groups.                                       |                        |
| Salgado et al. (2015)       | 14                   | m           | 26 ± 5       | PRO Football                   | <input type="checkbox"/>            | <input checked="" type="checkbox"/> | <input checked="" type="checkbox"/> | <input type="checkbox"/>            | 40-60                    | 3      | Fatigue      | Football match 90 min.                                                                                                                                                                                                                                                                     |                        |
| Skinner et al. (1986)       | 11                   | m           | 23 ± 1       | Navy SEALs                     | <input type="checkbox"/>            | <input checked="" type="checkbox"/> | <input checked="" type="checkbox"/> | <input type="checkbox"/>            | 05-25                    | 5      | Fatigue      | 3 miles sprinting (alternate 1 & 1/4 mile all-out; 90 s rest) & 2x treadmill session (2 min., 4.8-5.6 kmh <sup>-1</sup> , 15%; 90s rest between sessions).                                                                                                                                 |                        |
| Van Tiggelen et al. (2008)  | 64                   | b           | 25 ± 4       | healthy                        | <input checked="" type="checkbox"/> | <input checked="" type="checkbox"/> | <input checked="" type="checkbox"/> | <input type="checkbox"/>            | 45                       | 3      | Fatigue      | Isokinetic MVC (120°s <sup>-1</sup> , 150s, 30 rest) until fatigue (first 5 repetitions <50% PT <sub>max</sub> assessed in the previous series).                                                                                                                                           |                        |
| Vila-Cha et al. (2011)      | 15                   | m           | 25 ± 4       | healthy                        | <input type="checkbox"/>            | <input checked="" type="checkbox"/> | <input checked="" type="checkbox"/> | <input type="checkbox"/>            | 120                      | 2      | Fatigue      | Eccentric knee extension (60°s <sup>-1</sup> , 4 sets, 25 reps, 3 min rest).                                                                                                                                                                                                               |                        |
| Wieber et al. (2023)        | 25                   | b           | 25 ± 2       | Sport students                 | <input checked="" type="checkbox"/> | <input checked="" type="checkbox"/> | <input checked="" type="checkbox"/> | <input checked="" type="checkbox"/> | 150                      | 2      | Fatigue      | Eccentric knee extension (60°s <sup>-1</sup> , 4 sets, 25 reps, 3 min rest).                                                                                                                                                                                                               |                        |
|                             |                      |             |              |                                |                                     |                                     |                                     |                                     | random                   | 5      | BP & DoM     |                                                                                                                                                                                                                                                                                            |                        |

BP=body position; b=both genders; DoM=direction of Movement; f=female; m=male; META=meta-analysis allocation; Mov.=Movement MVC=maximal voluntary contraction PRO=professional athlete; PT=peak torque; reps=repetitions.
